# Supplementary material for: Structures and ionization energies of small lithium doped germanium clusters
Source: Royal Society of Chemistry journal article supplement (doi:10.1039/c3cp44395g), 2013-01-01
Supplement: c3cp44395g.pdf [file c3cp44395g.pdf]

## **Electronic Supplementary Information (ESI)**

# **Structures and ionization energies of small lithium doped germanium clusters**

**Jorg De Haeck, Truong Ba Tai, Soumen Bhattacharyya, Hai Thuy Le, Ewald Janssens, Minh Tho Nguyen and Peter Lievens\***

*<sup>a</sup>Laboratory of Solid State Physics and Magnetism, KU Leuven, B-3001 Leuven, Belgium*

*<sup>a</sup>Department of Chemistry, KU Leuven, B-3001 Leuven, Belgium*

**The Electronic Supplementary Information contains:**

### **Part A: Experimental supplementary information**

- Deconvolution scheme used to analyse the  $\text{Ge}_n\text{Li}_m$  mass spectra
- Additional photo-ionization efficiency curves (Fig. S1 and Table SI)

### **Part B: Computational supplementary information**

- Structures and relative energies of low-energetic cationic and neutral  $\text{Ge}_n\text{Li}_m^{0,+}$  ( $n = 5-10$ ;  $m = 1-4$ ) at the B3LYP/6-311+G(d) level of theory (Figs. S2–S7)
- Total and partial density of states of  $\text{Ge}_n\text{Li}_m$  ( $n = 5-10$ ,  $m = 0-4$ ) (Fig. S8).
- Shapes of the molecular orbitals of  $\text{Ge}_5\text{Li}_m$  ( $m = 0-4$ ) (Fig. S9).
- Average lithium adsorption energies of the  $\text{Ge}_n\text{Li}_m$  ( $n = 5-10$ ,  $m = 1-4$ ) (Table SII)

## Part A

### Deconvolution scheme used to analyse the $\text{Ge}_n\text{Li}_m$ mass spectra

Due to the natural isotope distribution of lithium and germanium, the mass spectra (see Fig. 1) are dominated by broad peaks, which reflect the coexistence of  $\text{Ge}_n\text{Li}_m$  clusters with different amounts of lithium (for a given  $n$ ). The isotope patterns of different  $\text{Ge}_n\text{Li}_m$  clusters overlap with each other and cannot readily be resolved with our current instrumentation except for the smallest sizes ( $n < 5$ ). To extract information on the intensities of the individual clusters, a deconvolution scheme is applied. A single stoichiometry ( $\text{Ge}_n\text{Li}_m$ ) has an isotope pattern, which can be approximated by a Gaussian function for sizes with  $n > 5$ . Therefore, the convoluted spectrum is modeled as a sum of Gaussian functions, corresponding to the different stoichiometries, superposed on a fixed baseline. The full-width-at-half-max' ( $FWHM$ ) of the Gaussian peaks are known from the natural isotope distribution and the amplitudes are fitting parameters. The integrals  $I^d$  from the deconvoluted spectrum can then be derived from the integrals  $I$  of the convoluted spectrum by:

$$I_j^d = C_{jj} \sum_i I_i C_{ij} \quad (1)$$

The matrix elements are given by:

$$C_{ij} = FWHM_i \left[ \text{erf} \left( 2\sqrt{\ln 2} \frac{t_j - t_i + \Delta t}{FWHM_i} \right) - \text{erf} \left( 2\sqrt{\ln 2} \frac{t_j - t_i - \Delta t}{FWHM_i} \right) \right] \quad (2)$$

The integration interval  $\Delta t$ , the distance between the peaks  $t_j - t_i$  and the  $FWHM_i$  are known parameters.

### Additional photo-ionization efficiency (PIE) curves

Besides those shown in Fig. 2, PIE curves could also be measured for certain clusters that are not treated computationally in the present work. The PIE curves of these  $\text{Ge}_n\text{Li}_m$  clusters are shown in Fig. S1 and the derived ionization energies are listed in Table SI.

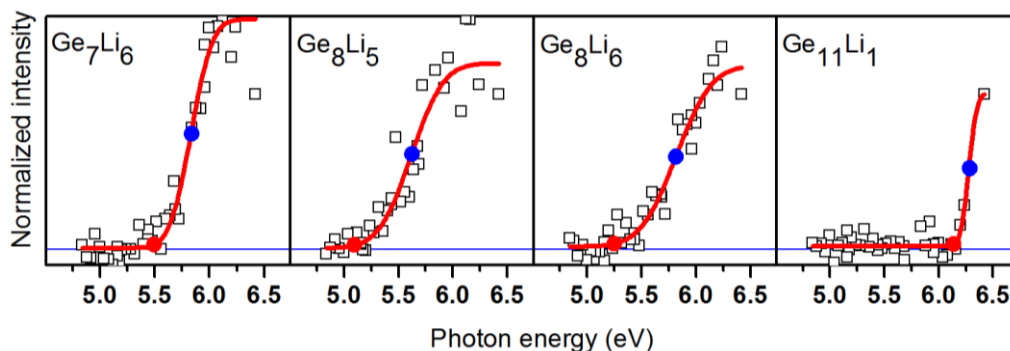

**Fig. S1.** PIE curves of  $\text{Ge}_7\text{Li}_6$ ,  $\text{Ge}_8\text{Li}_5$ ,  $\text{Ge}_8\text{Li}_6$ , and  $\text{Ge}_{11}\text{Li}_1$  clusters. The open squares represent the experimental data, while the solid (red) lines represent smeared-out step functions fitted to the data. The experimental VIE and the ionization threshold are indicated by a blue and a red dot, respectively.

**Table SI.** Experimentally determined vertical ionization energies (VIE) and ionization thresholds as derived from the PIE curves in Fig. S1 following the procedure detailed in the article. The standard error from the fitting procedure is given between brackets.

| Cluster                     | VIE (eV)    | Ionization threshold (eV) |
|-----------------------------|-------------|---------------------------|
| $\text{Ge}_7\text{Li}_6$    | 5.83 (0.03) | 5.49 (0.12)               |
| $\text{Ge}_8\text{Li}_5$    | 5.62 (0.07) | 5.10 (0.38)               |
| $\text{Ge}_8\text{Li}_6$    | 5.82 (0.03) | 5.24 (0.15)               |
| $\text{Ge}_{11}\text{Li}_1$ | 6.28 (0.03) | 6.14 (0.12)               |

## Part B

Structures and relative energies of low-energetic cationic and neutral  $\text{Ge}_n\text{Li}_m^{0,+}$  ( $n = 5-10$ ;  $m = 1-4$ ) clusters

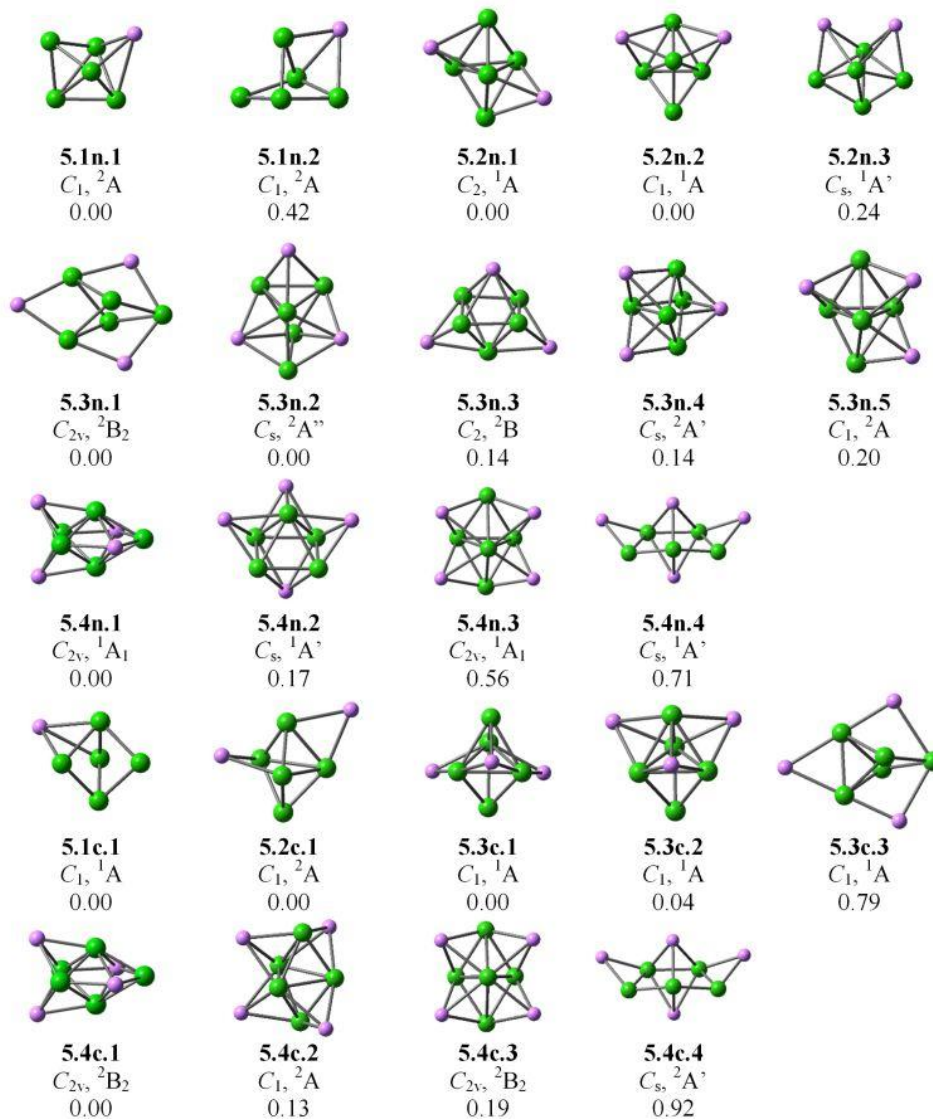

**Fig. S2.** The shape, relative energy (in eV), and point group of low energetic isomers of  $\text{Ge}_5\text{Li}_m^{0,+}$  ( $m = 1-4$ ) at the B3LYP/6-311+G(d,p) level.

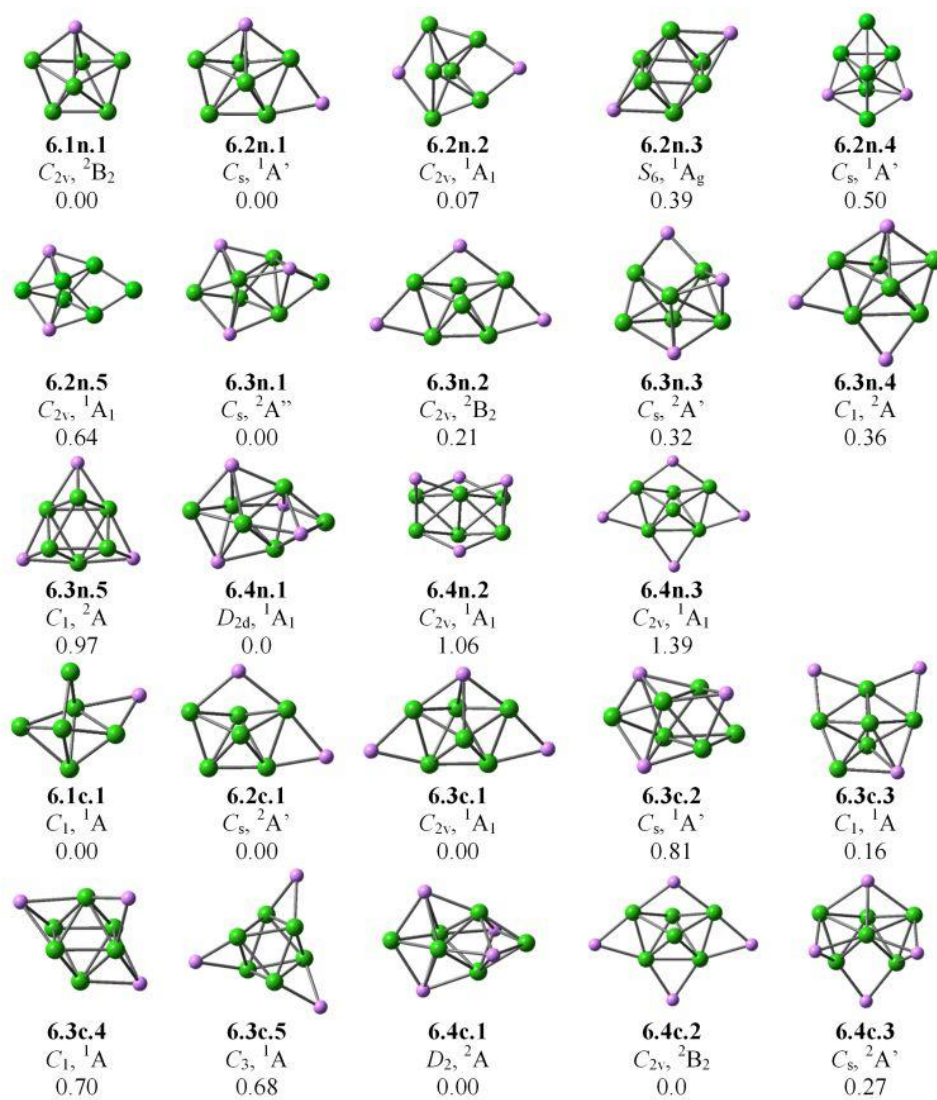

**Fig. S3.** The shape, relative energy (in eV), and point group of low energetic isomers of  $\text{Ge}_6\text{Li}_m^{0,+}$  ( $m = 1-4$ ) at the B3LYP/6-311+G(d,p) level.

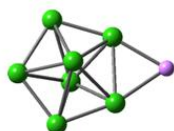

**7.1n.1**  
 $C_{2v}, ^2B_2$   
 0.00

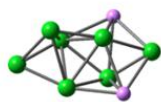

**7.2n.1**  
 $C_1, ^1A$   
 0.00

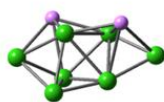

**7.2n.2**  
 $C_1, ^1A$   
 0.05

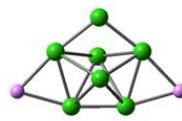

**7.2n.3**  
 $C_{2v}, ^1A_1$   
 0.06

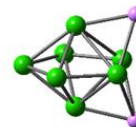

**7.2n.4**  
 $C_{2v}, ^1A_1$   
 0.18

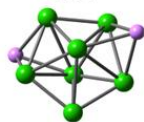

**7.2n.5**  
 $C_1, ^1A$   
 0.21

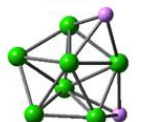

**7.2n.6**  
 $C_1, ^1A$   
 0.24

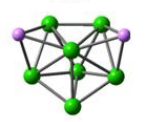

**7.2n.7**  
 $C_1, ^1A$   
 0.25

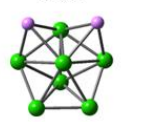

**7.2n.8**  
 $C_{3v}, ^1A_1'$   
 0.27

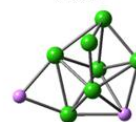

**7.2n.9**  
 $C_1, ^1A$   
 0.43

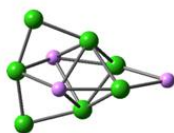

**7.3n.1**  
 $C_{2v}, ^2B_2$   
 0.00

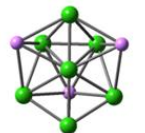

**7.3n.2**  
 $C_{3v}, ^2A_1'$   
 0.06

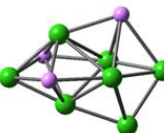

**7.3n.3**  
 $C_{3v}, ^2A_1'$   
 0.14

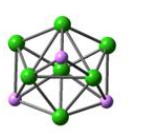

**7.3n.4**  
 $C_{3v}, ^2A_1'$   
 0.26

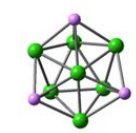

**7.3n.5**  
 $C_{3v}, ^2A_1'$   
 0.34

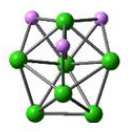

**7.3n.6**  
 $C_{3v}, ^2A_1'$   
 0.56

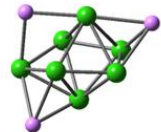

**7.3n.7**  
 $C_1, ^2A$   
 0.59

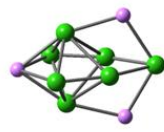

**7.3n.8**  
 $C_{3v}, ^2A_1'$   
 0.59

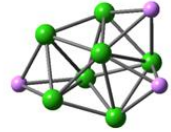

**7.3n.9**  
 $C_1, ^2A$   
 0.74

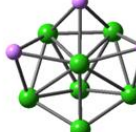

**7.3n.10**  
 $C_1, ^2A$   
 0.80

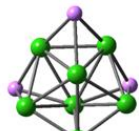

**7.3n.11**  
 $C_1, ^2A$   
 0.74

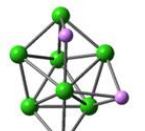

**7.3n.12**  
 $C_1, ^2A$   
 0.69

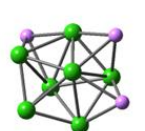

**7.3n.13**  
 $C_1, ^2A$   
 0.69

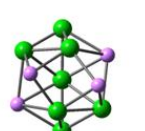

**7.4n.1**  
 $C_2, ^1A$   
 0.00

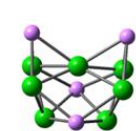

**7.4n.2**  
 $C_{3v}, ^1A_1'$   
 0.08

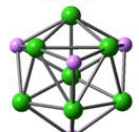

**7.4n.3**  
 $C_{3v}, ^1A_1$   
 0.24

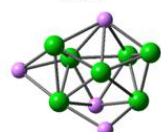

**7.4n.4**  
 $C_1, ^1A$   
 0.32

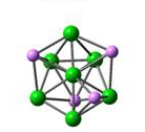

**7.4n.5**  
 $C_1, ^1A$   
 0.49

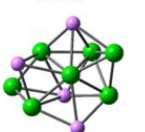

**7.4n.6**  
 $C_1, ^1A$   
 0.43

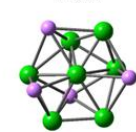

**7.4n.7**  
 $C_1, ^1A$   
 0.49

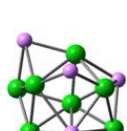

**7.4n.8**  
 $C_1, ^1A$   
 0.55

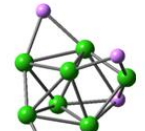

**7.4n.9**  
 $C_{3v}, ^1A_1'$   
 0.97

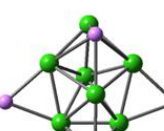

**7.4n.10**  
 $C_{3v}, ^1A_1'$   
 1.03



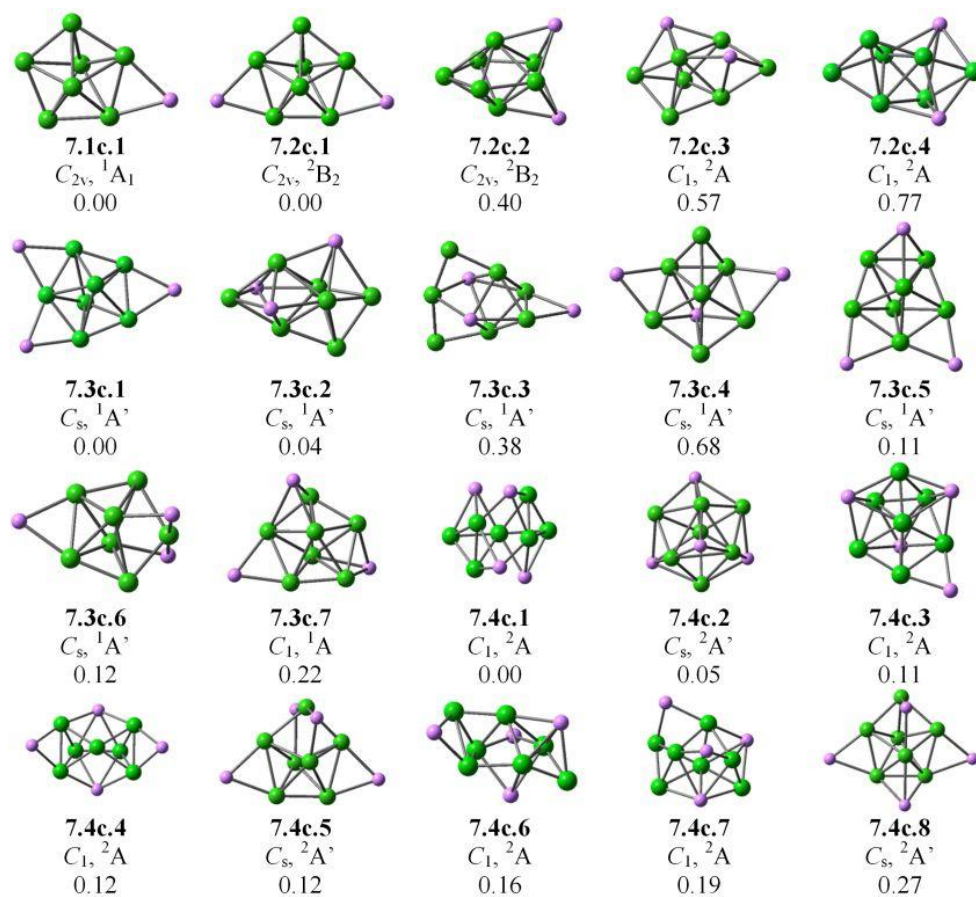

**Fig. S4.** The shape, relative energy (in eV), and point group of low energetic isomers of  $\text{Ge}_7\text{Li}_m^{0,+}$  ( $m = 1-4$ ) at the B3LYP/6-311+G(d,p) level.

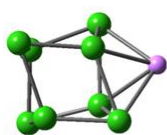

**8.1n.1**  
 $C_1, ^2A$   
0.00

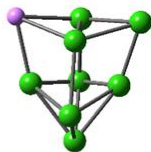

**8.1n.2**  
 $C_1, ^2A$   
0.04

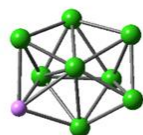

**8.1n.3**  
 $C_1, ^2A$   
0.06

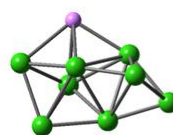

**8.1n.4**  
 $C_1, ^2A$   
0.07

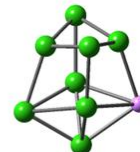

**8.1n.5**  
 $C_1, ^2A$   
0.14

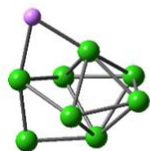

**8.1n.6**  
 $C_s, ^2A'$   
0.23

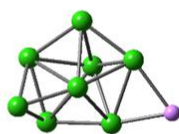

**8.1n.7**  
 $C_1, ^2A$   
0.27

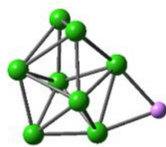

**8.1n.8**  
 $C_1, ^2A$   
0.28

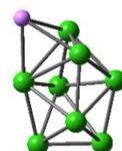

**8.1n.9**  
 $C_1, ^2A$   
0.35

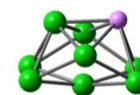

**8.1n.10**  
 $C_s, ^2A'$   
0.45

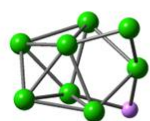

**8.1c.1**  
 $C_1, ^1A$   
0.00

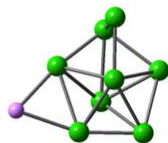

**8.1c.2**  
 $C_1, ^1A$   
0.04

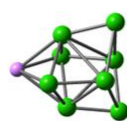

**8.1c.3**  
 $C_1, ^1A$   
0.38

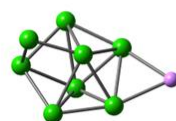

**8.1c.4**  
 $C_1, ^1A$   
0.10

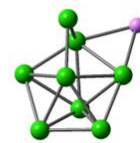

**8.1c.5**  
 $C_1, ^1A$   
0.10



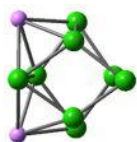

**8.2n.1**  
 $C_{1v} \ ^1A'$   
0.00

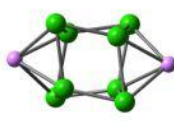

**8.2n.2**  
 $C_{1v} \ ^1A'$   
0.09

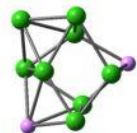

**8.2n.3**  
 $C_{1v} \ ^1A'$   
0.17

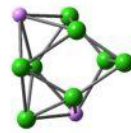

**8.2n.4**  
 $C_{1v} \ ^1A'$   
0.20

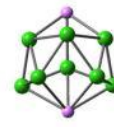

**8.2n.5**  
 $C_{2v} \ ^1A'$   
0.27

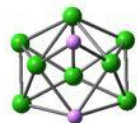

**8.2n.6**  
 $C_{2v} \ ^1A'$   
0.36

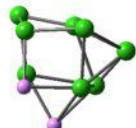

**8.2n.7**  
 $C_{1v} \ ^1A'$   
0.46

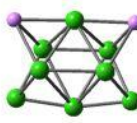

**8.2n.8**  
 $C_{2v} \ ^1A'$   
0.66

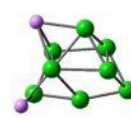

**8.2n.9**  
 $C_{1v} \ ^1A'$   
0.76

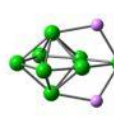

**8.2n.10**  
 $C_{2v} \ ^1A'$   
0.88

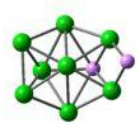

**8.2n.11**  
 $C_{1v} \ ^1A'$   
0.78

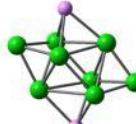

**8.2n.12**  
 $C_{1v} \ ^1A'$   
0.78

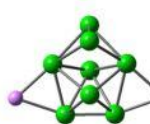

**8.2n.13**  
 $C_{2v} \ ^1A'$   
0.58

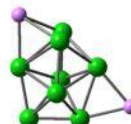

**8.2n.14**  
 $C_{1v} \ ^1A'$   
0.58

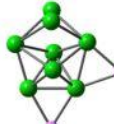

**8.2n.15**  
 $C_{1v} \ ^1A'$   
0.80

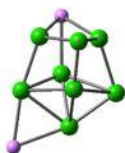

**8.2c.1**  
 $C_{1v} \ ^2A'$   
0.00

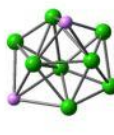

**8.2c.2**  
 $C_{1v} \ ^2A'$   
0.02

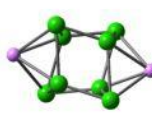

**8.2c.3**  
 $C_{1v} \ ^2A'$   
0.03

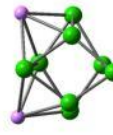

**8.2c.4**  
 $C_{1v} \ ^2A'$   
0.17

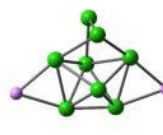

**8.2c.5**  
 $C_{1v} \ ^2A'$   
0.12

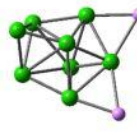

**8.2c.6**  
 $C_{1v} \ ^2A'$   
0.23

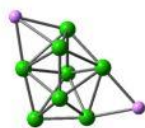

**8.2c.7**  
 $C_{1v} \ ^2A'$   
0.22

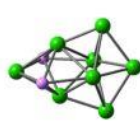

**8.2c.8**  
 $C_{1v} \ ^2A'$   
0.24

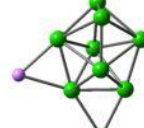

**8.2c.9**  
 $C_{1v} \ ^2A'$   
0.32

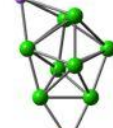

**8.2c.10**  
 $C_{1v} \ ^2A'$   
0.32

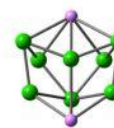

**8.2c.11**  
 $C_{2v} \ ^2A'$   
0.26

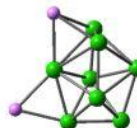

**8.2c.12**  
 $C_{1v} \ ^2A'$   
0.34

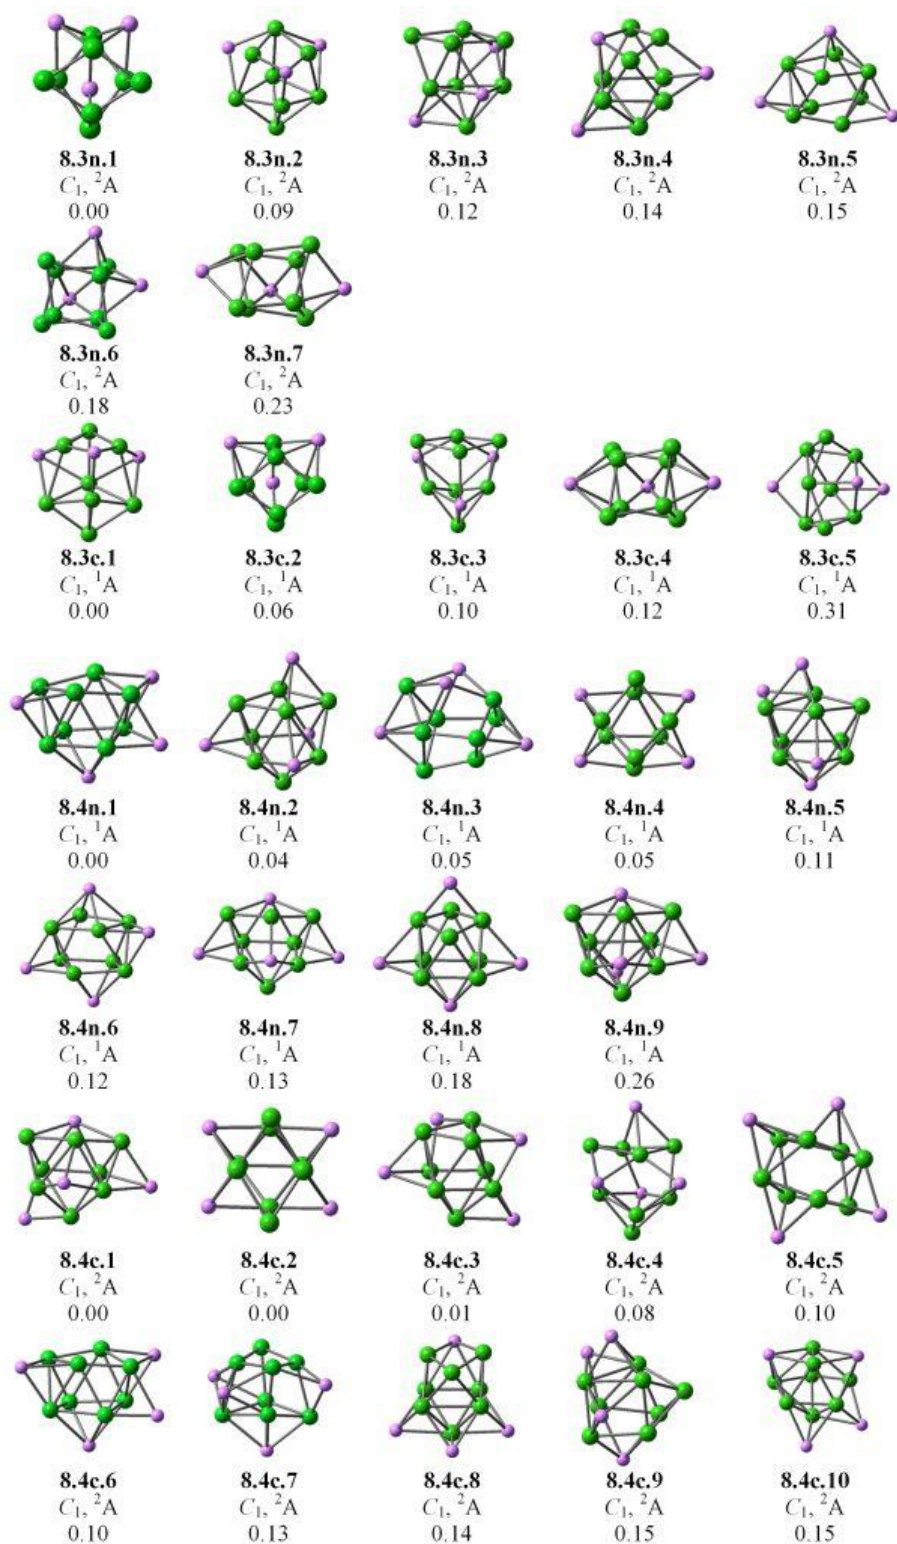

**Fig. S5.** The shape, relative energy (in eV), and point group of low energetic isomers of  $\text{Ge}_8\text{Li}_m^{0,+}$  ( $m = 1-4$ ) at the B3LYP/6-311+G(d,p) level.

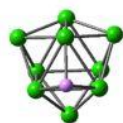

**9.1n.1**  
 $C_{3v}, ^2A_1$   
0.00

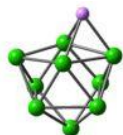

**9.1n.2**  
 $C_1, ^2A$   
0.08

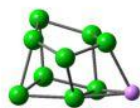

**9.1n.3**  
 $C_1, ^2A$   
0.09

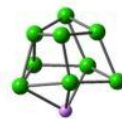

**9.1n.4**  
 $C_1, ^2A$   
0.19

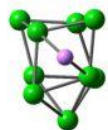

**9.1c.1**  
 $C_1, ^1A$   
0.00

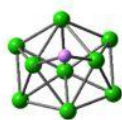

**9.1c.3**  
 $C_{2v}, ^1A_1$   
0.07

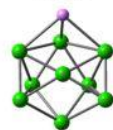

**9.1c.4**  
 $C_s, ^1A'$   
0.14

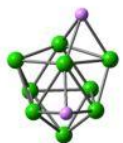

**9.2n.1**  
 $C_1, ^1A$   
0.00

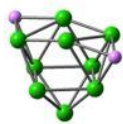

**9.2n.2**  
 $C_1, ^1A$   
0.05

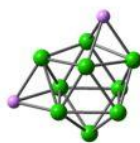

**9.2n.3**  
 $C_s, ^1A'$   
0.03

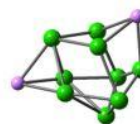

**9.2n.4**  
 $C_1, ^1A$   
0.03

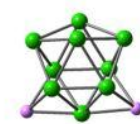

**9.2n.5**  
 $C_{2v}, ^1A_1$   
0.04

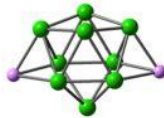

**9.2n.6**  
 $C_{2v}, ^1A_1$   
0.05

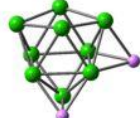

**9.2n.7**  
 $C_1, ^1A$   
0.07

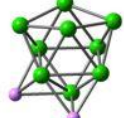

**9.2n.8**  
 $C_1, ^1A$   
0.12

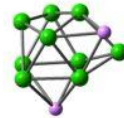

**9.2n.9**  
 $C_1, ^1A$   
0.14

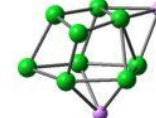

**9.2n.10**  
 $C_1, ^1A$   
0.15

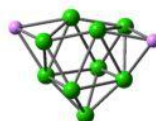

**9.2c.1**  
 $C_2, ^2B$   
0.00

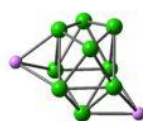

**9.2c.3**  
 $C_1, ^2A$   
0.03

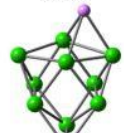

**9.2c.2**  
 $C_1, ^2A$   
0.08

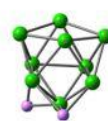

**9.2c.4**  
 $C_1, ^2A$   
0.16

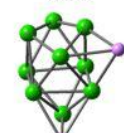

**9.2c.5**  
 $C_1, ^2A$   
0.16

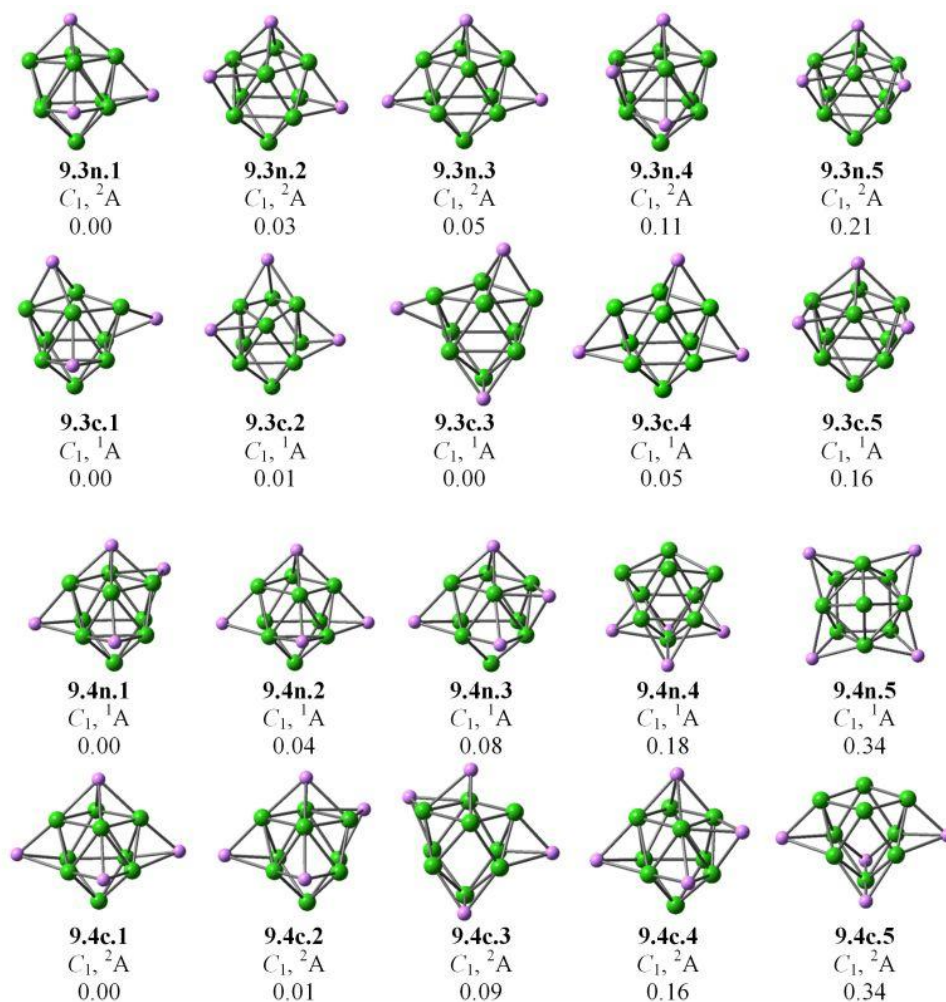

**Fig. S6.** The shape, relative energy (in eV), and point group of low energetic isomers of  $\text{Ge}_9\text{Li}_m^{0,+}$  ( $m = 1-4$ ) at the B3LYP/6-311+G(d,p) level.



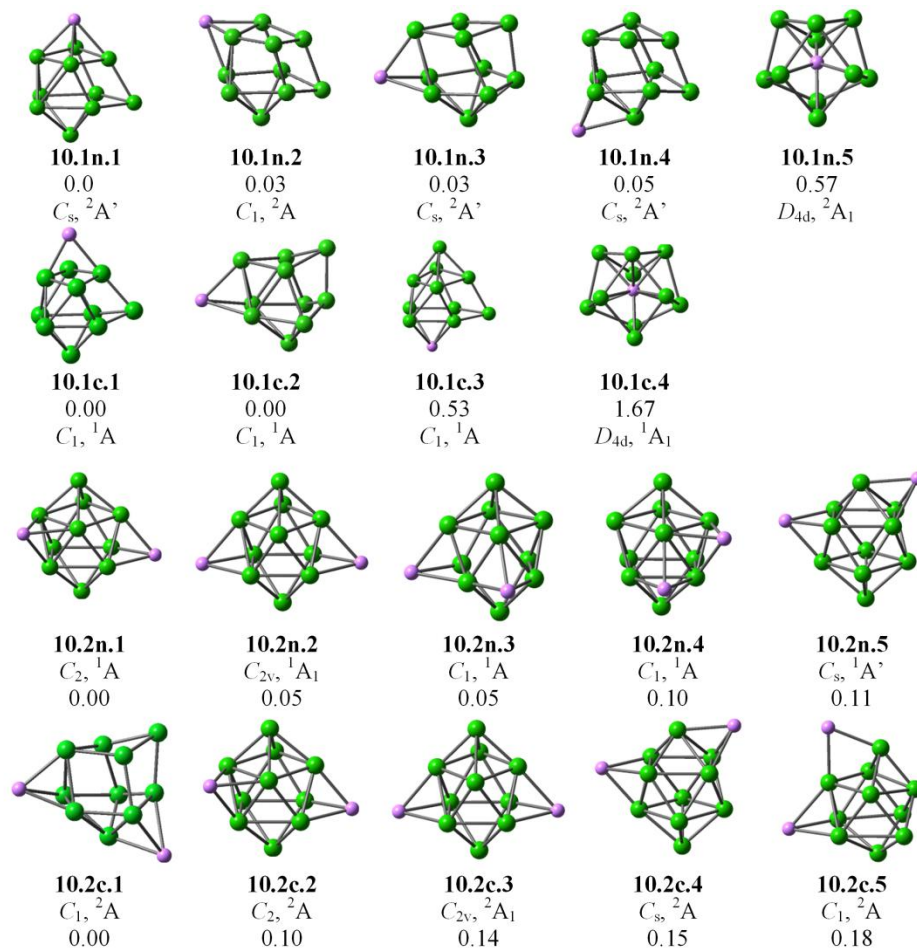

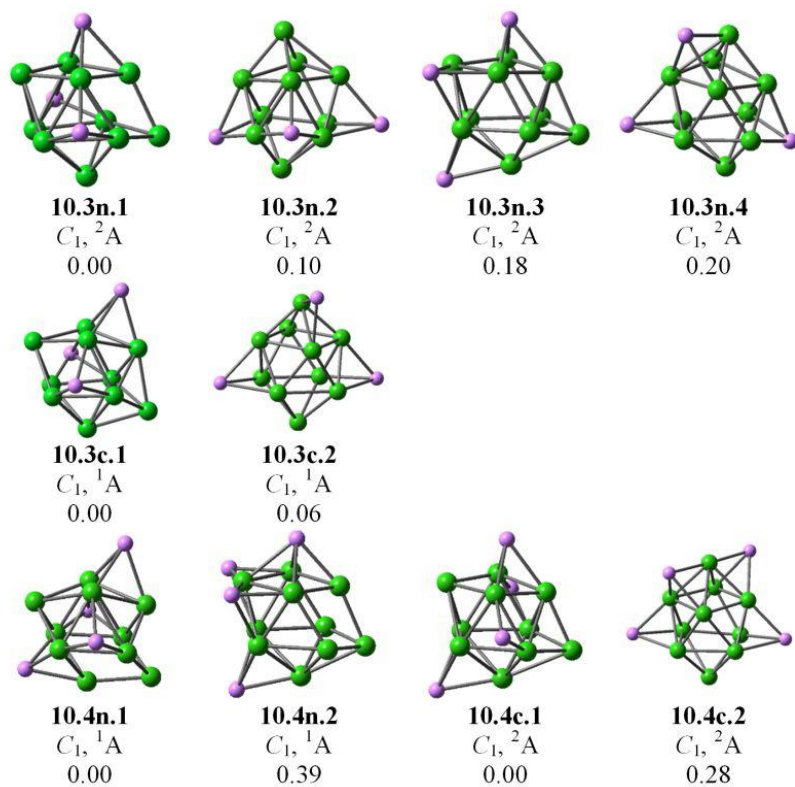

**Fig. S7.** The shape, relative energy (in eV), and point group of low energetic isomers of  $\text{Ge}_{10}\text{Li}_m^{0,+}$  ( $m = 1-4$ ) at the B3LYP/6-311+G(d,p) level.



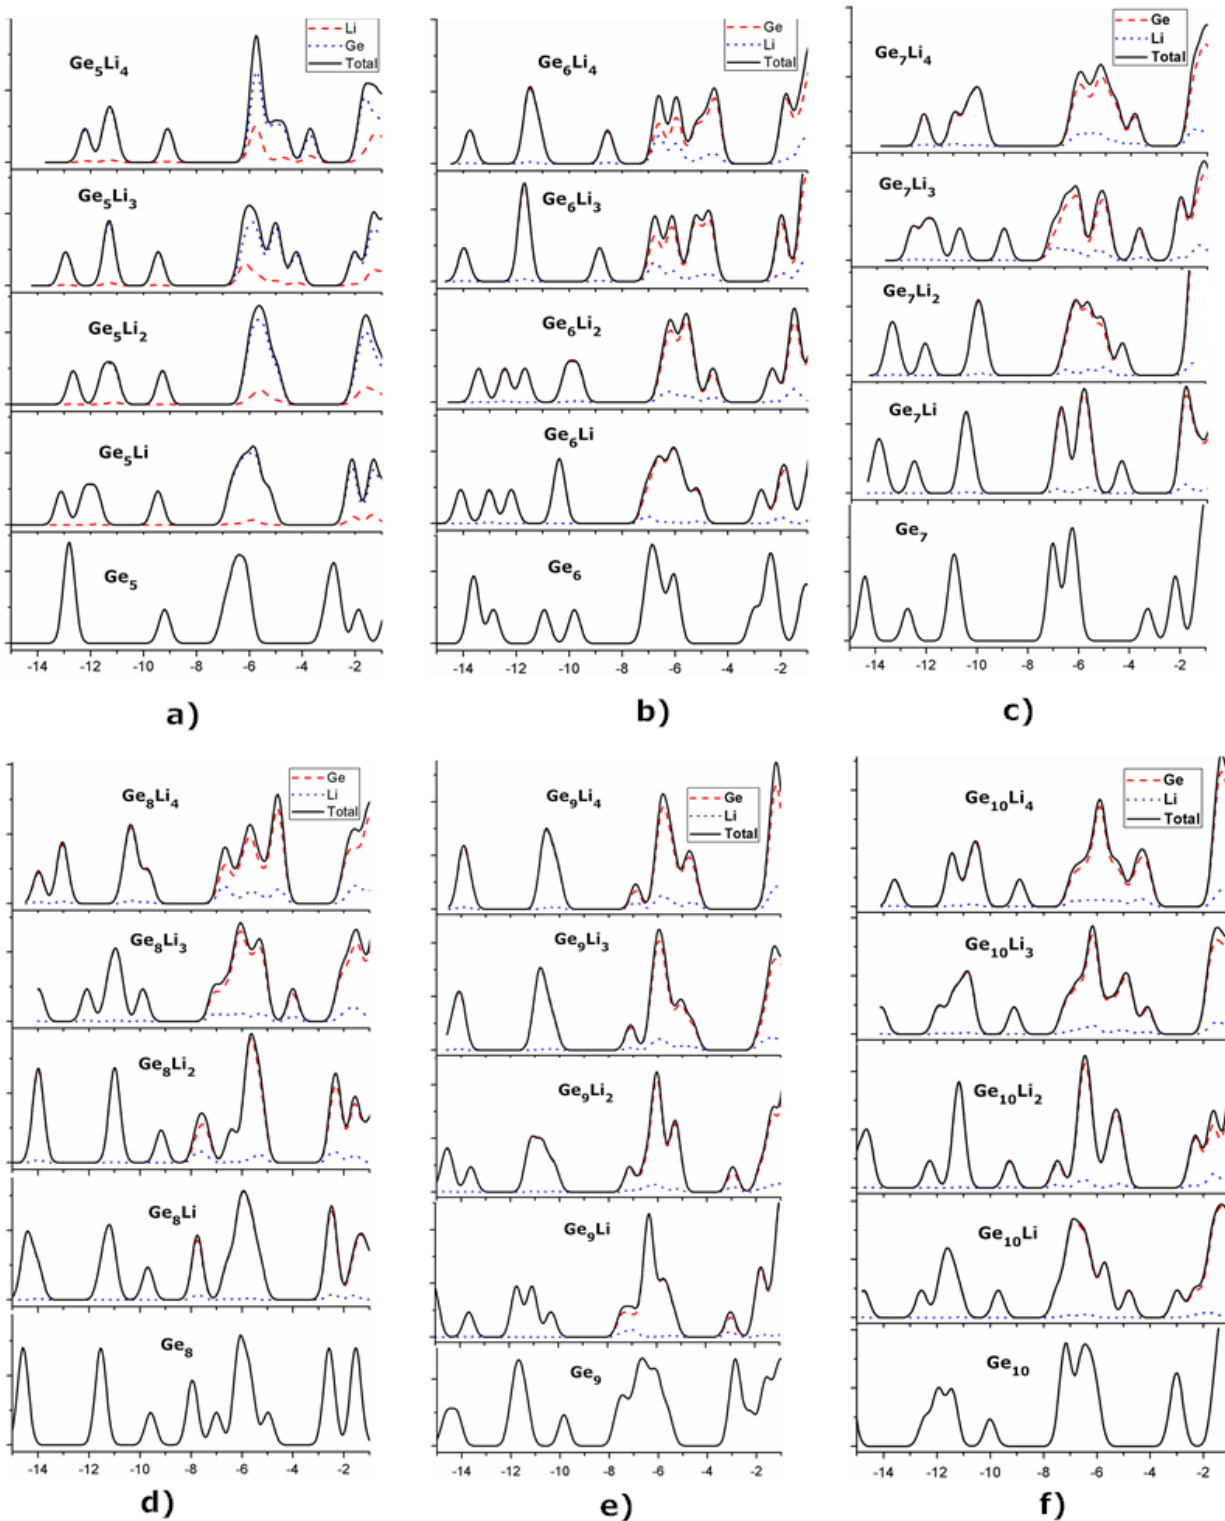

**Fig. S8.** Total and partial density of states of  $\text{Ge}_n\text{Li}_m$  clusters ( $n = 5-8$ ,  $m = 0-4$ ).

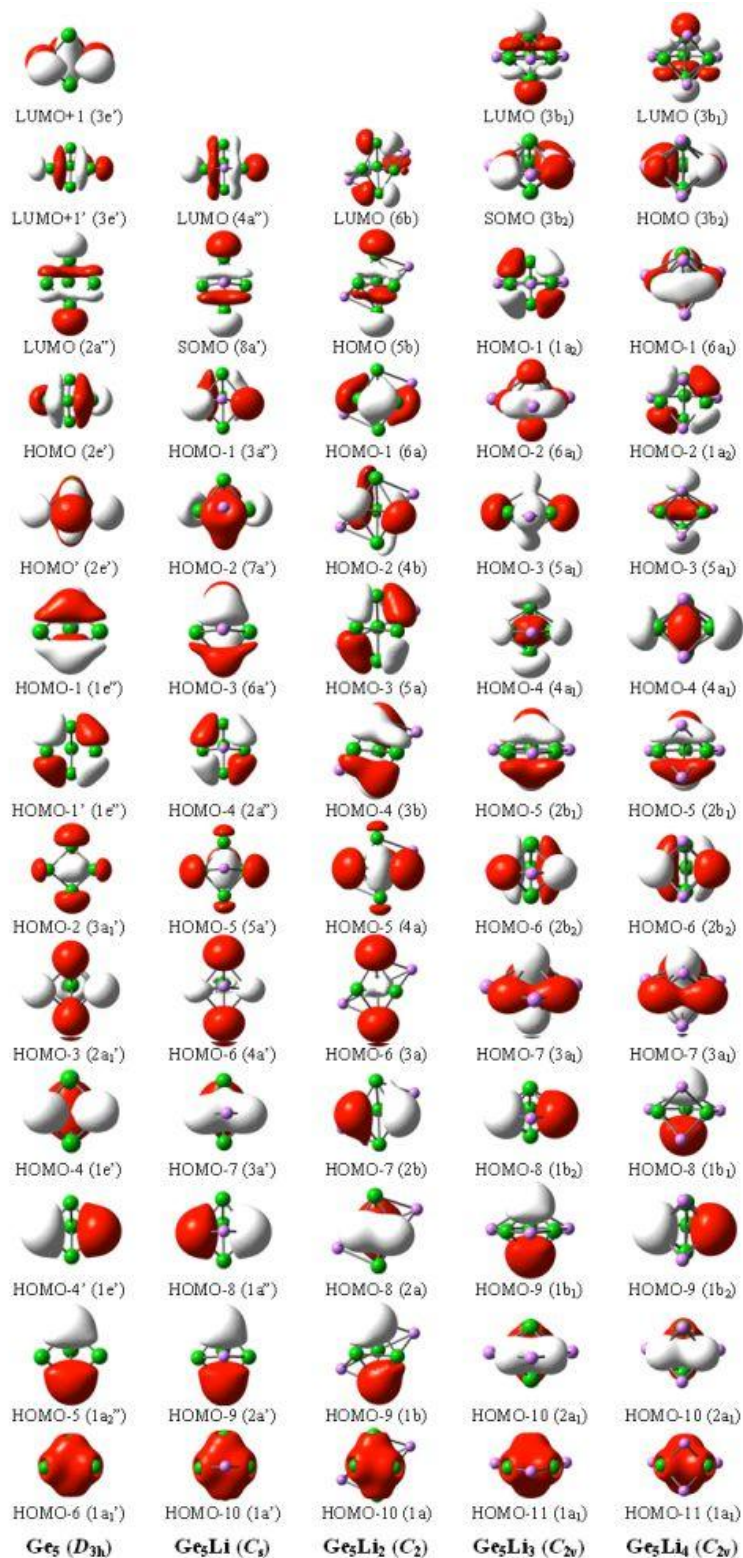

**Fig. S9.** Shapes of the molecular orbitals of Ge<sub>5</sub>Li<sub>m</sub> ( $m = 0-4$ ).

**Table SII.** Average lithium adsorption energies ( $E_d$ , eV) of the  $\text{Ge}_n\text{Li}_m$  ( $n = 5-10$ ,  $m = 1-4$ ) clusters at the B3LYP/6-311+G(d) level.

| <b>n</b>  | <b><math>E_d</math> (eV)</b>             |                                            |                                            |                                            |
|-----------|------------------------------------------|--------------------------------------------|--------------------------------------------|--------------------------------------------|
|           | <b><math>\text{Ge}_n\text{Li}</math></b> | <b><math>\text{Ge}_n\text{Li}_2</math></b> | <b><math>\text{Ge}_n\text{Li}_3</math></b> | <b><math>\text{Ge}_n\text{Li}_4</math></b> |
| <b>5</b>  | 1.95                                     | 2.16                                       | 1.88                                       | 1.84                                       |
| <b>6</b>  | 1.71                                     | 1.89                                       | 1.74                                       | 1.89                                       |
| <b>7</b>  | 1.44                                     | 1.60                                       | 1.57                                       | 1.74                                       |
| <b>8</b>  | 1.82                                     | 2.12                                       | 1.90                                       | 1.93                                       |
| <b>9</b>  | 1.8                                      | 2.09                                       | 1.99                                       | 2.09                                       |
| <b>10</b> | 1.42                                     | 1.86                                       | 1.65                                       | 1.67                                       |
